# Supplementary material for: Oncogene-Induced Senescence Limits the Progression of Pancreatic Neoplasia through Production of Activin A
Source: Oxford University Press journal article supplement (doi:10.1158/0008-5472.can-19-3763), 2020-06-29
Supplement: 00085472can193763-sup-233230_2_supp_6333830_qbclg5.docx [file 00085472can193763-sup-233230_2_supp_6333830_qbclg5.docx]

***Supplemental Table 1.*** List of used Primary antibodies.

| ***Antigen*** | ***Species*** | ***Source*** | ***Dilution*** | |
| --- | --- | --- | --- | --- |
| IHC | IF |
| ALK4 | Rabbit | Abcam  (ab109300) | 1:5000 | 1:500 |
| Amylase | Rabbit | Sigma (A8273) | 1:5000 | / |
| Cytokeratin19 | Rat | DHSB  (Troma-III) | 1:100 | 1:20 |
| Desmin | Goat | R&D Systems  (AF3844) | 1:2500 | / |
| Phospho-H2AX (H2AX-ser139) | Rabbit | Cell Signaling  (#9718) | 1:1500 | 1:300 |
| Phospho-Smad2 | Rabbit | Chemicon (ab3849) | Na | 1:100 |
| ActivinA | Rabbit | Genetex Inc.  (GTX108405) | 1:500 | 1:1000* |
| Ki67 | Goat | SCBT  (sc-7846) | 1:750 | 1:750* |
| p21WAF1/Cip1 | Mouse | Dako  (M7202) | 1:100 | 1:50 |
| Sox9 | Rabbit | Sigma  (C89924) | 1:5000 | 1:100 |

* Combined with a Tyramide Signal Amplification (TSA system, Perkin-Elmer)
