# Supplementary material for: Oncogene-Induced Senescence Limits the Progression of Pancreatic Neoplasia through Production of Activin A
Source: Oxford University Press journal article supplement (doi:10.1158/0008-5472.can-19-3763), 2020-06-29
Supplement: 00085472can193763-sup-233230_2_supp_6339205_qbgbr5.docx [file 00085472can193763-sup-233230_2_supp_6339205_qbgbr5.docx]

***Supplemental Table 2.*** Primer pairs used for real-time quantitative RT-PCR.

| **Gene name** | **Specie** | **Forward primer sequence (5'-3')** | **Reverse primer sequence (5'-3')** |
| --- | --- | --- | --- |
| *InhBA* | Mouse | CCAAGCTGAGACCCATGTCC | CCACTGTCTTCTCTGGACTCTC |
| *Cdkn1a* | Mouse | GCAGATCCACAGCGATATCC | CAACTGCTCACTGTCCACGG |
| *Cdkn2a* | Mouse | CCCAACGCCCCGAACT | GCAGAAGAGCTGCTACGTGAA |
| *IL6* | Mouse | TGATTGTATGAACAACGATGATGC | GGACTCTGGCTTTGTCTTTCTTGT |
| *IL1a* | Mouse | CGCTTGAGTCGGCAAAGAAAT | TGGCAGAACTGTAGTCTTCGT |
| *IL1b* | Mouse | TGCCACCTTTTGACAGTGATG | TGATGTGCTGCTGCGAGATT |
| *Ccl2* | Mouse | CATCCACGTGTTGGCTCA | GATCATCTTGCTGGTGAATGAGT |
| *Ccl20* | Mouse | ACTGGGTGAAAAGGGCTGT | GTCCAATTCCATCCCAAAAA |
| *Vegfc* | Mouse | CCAGCACAGGTTACCTCAGCAA | TAGACATGCACCGGCACCAA |
| *Amy2a* | Mouse | TGCAGGTCTCTCCACCCAATGAAA | TGCACCTTGTCACCATGTCTCTGA |
| *Rbpjl* | Mouse | ATGCCAAGGTGGCTCAGAAAT | CTTGGTCTTGCATTGGCTTCA |
| *Cpa1* | Mouse | TACACCCACAAAACGAATCGC | GCCACGGTAAGTTTCTGAGCA |
| *Ptf1a* | Mouse | TGCGCTTGGCCATAGGCTACATTA | AGATGATAACCTTCTGGGCCTGGT |
| *Cela1* | Mouse | AATGTCATTGCCTCCAACTGAGCG | ATTAGACAAGTGCTCGGCCACTGA |
| *Sox9* | Mouse | CAAGACTCTGGGCAAGCTCTG | TCCGCTTGTCCGTTCTTCAC |
| *Rbpj* | Mouse | GCTGACTTGTGCATTGCTTCAGGA | CCACTGTTGTGAACTGGCGTGGAA |
| *Pdx1* | Mouse | AAATCCACCAAAGCTCACGC | CGGTCAAGTTCAACATCACTGC |
| *Hes1* | Mouse | AGAGAAGGCAGACATTCTGGA | GTCACCTCGTTCATGCACTC |
| *Krt7* | Mouse | CACGAACAAGGTGGAGTTGGA | TGTCTGAGATCTGCGACTGCA |
| *Gapdh** | Mouse | CAACGACCCCTTCATTGACC | GGTCTCGCTCCTGGAAGATG |
| *Hprt** | Mouse | GTTGGGCTTACCTCACTGCT | TAATCACGACGCTGGGACTG |
| *CDKN1A* | *Human* | ACTCTCAGGGTCGAAAACGG | ATGTAGAGCGGGCCTTTGAG |
| *GAPDH** | Human | GGTGTGAACCATGAGAAGTATGA | GAGTCCTTCCACGATACCAAAG |

*: genes used as housekeeping references.
